# Supplementary material for: Consensus screening for a challenging target: the quest for P-glycoprotein inhibitors
Source: Royal Society of Chemistry journal article supplement (doi:10.1039/d3md00649b), 2024-01-01
Supplement: d3md00649b1.pdf [file d3md00649b1.pdf]

## Electronic Supplementary Information

### Consensus screening for a challenging target: the quest for P-glycoprotein inhibitors

Paolo Governa<sup>a,b,\*</sup>, Marco Biagi<sup>c</sup>, Fabrizio Manetti<sup>b</sup>, Stefano Forli<sup>a,\*</sup>

<sup>a</sup> Department of Integrative Structural and Computational Biology, Scripps Research Institute, La Jolla, CA 92037 USA

<sup>b</sup> Department of Biotechnology, Chemistry and Pharmacy, University of Siena, 53100, Siena, Italy

<sup>c</sup> Department of Food and Drug, University of Parma, 43121, Parma, Italy

\* Corresponding authors: Paolo Governa (pgoverna@scripps.edu); Stefano Forli (forli@scripps.edu)

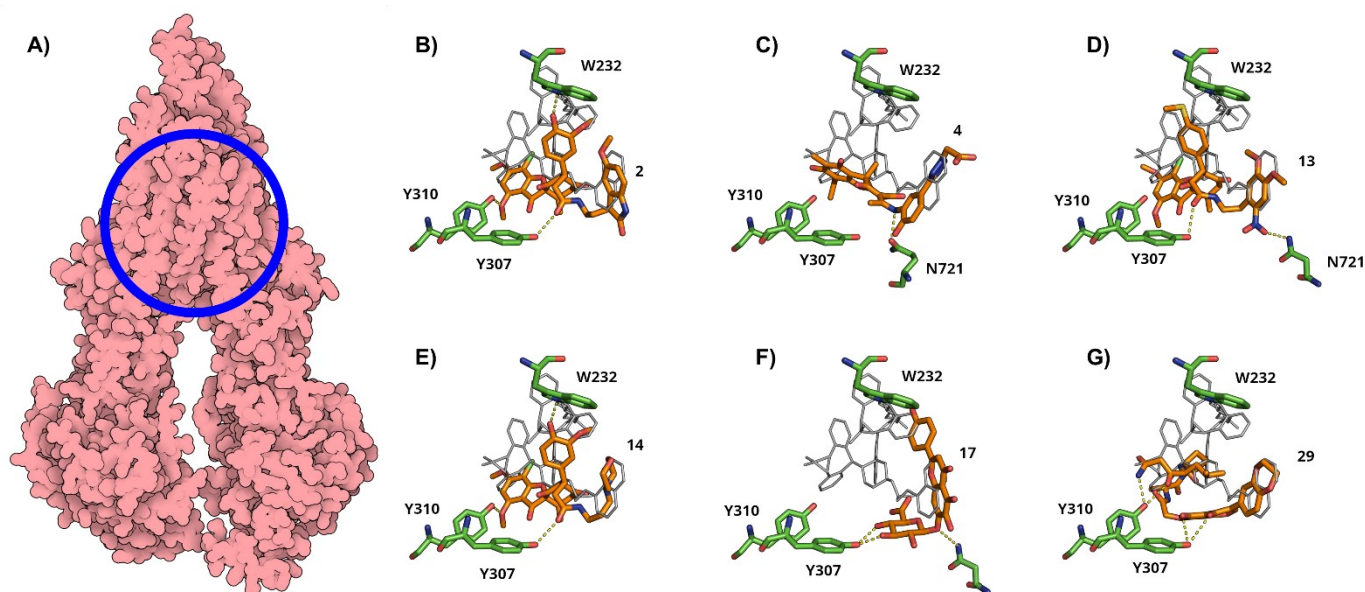

**Fig. S1.** P-gp binding site (A) and best docked pose of compounds 2 (B), 4 (C), 13 (D), 14 (E), 17 (F), and 29 (G) in the binding site of P-gp. Compounds are shown as orange sticks, while Trp232, Tyr307, Tyr310, and Asn721 are shown as green sticks. Hydrogen bonds are shown as yellow dashed lines. For comparison, the experimental binding pose of the two copies of zosuquidar is also shown in grey.
